# Supplementary material
Source: MDPI journal article supplement (https://www.mdpi.com/2073-4344/14/1/1)
Supplement: s1 [file s1 › catalysts-2750960-supplementary.pdf]

**Supplementary file**

**Table S1.** Variables optimized by central composite (CC) design for enhanced production of laccase.

| Components                                  | Code | Range and levels |       |       |       |       |
|---------------------------------------------|------|------------------|-------|-------|-------|-------|
|                                             |      | -2               | -1    | 0     | +1    | +2    |
| <b>Rice bran (g/L)</b>                      | A    | 12.5             | 20    | 27.5  | 35    | 35.5  |
| Yeast extract (g/L)                         | B    | 10               | 15    | 20    | 25    | 30    |
| CuSO <sub>4</sub> . 5H <sub>2</sub> O (g/L) | C    | 0.010            | 0.015 | 0.020 | 0.025 | 0.030 |
| Temperature (°C)                            | D    | 25               | 35    | 45    | 55    | 65    |
